# Supplementary material
Source: publisher figshare collection journal article supplement (https://frontiersin.figshare.com/ndownloader/files/29036289)
Supplement: Supplementary file 1 [file 29036289]

Figure 1: Chromatographic profile of phytochemicals Identified in Withania frutescens (L.) Pauquy collected from station A1

Figure 2: Chromatographic profile of phytochemicals Identified in Withania frutescens (L.) Pauquy collected from station A3

Table 1: Phytochemical compounds in Withania frutescens (L.) Pauquy collected from Station A1

| Peak | RT | Compound | Molecular Formula | Area  (%) | Structure |
| --- | --- | --- | --- | --- | --- |
| 1 | 7.77 | Morphinan-6-ol,7,8-didehydro-4,5-epoxy-3-methoxy-17-methyl-, (5.alpha.,6.alpha.) | C18H21NO3 | 3.44 | 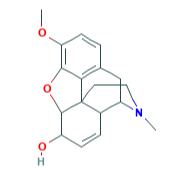 |
| 2 | 9.16 | 1,1'-Biphenyl, 3'-(1,1-dimethylethyl)-5'-methyl-2,6-dinitro | C17H18N2O4 | 29.16 | 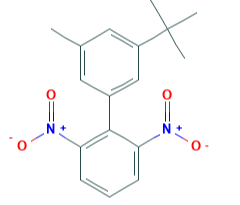 |
| 3 | 9.39 | 2-Chloroquinone | C6H3ClO2 | 17.91 | 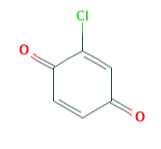 |
| 4 | 10.80 | Butanoic acid, 4-[(trimethylsilyl)oxy]-, trimethylsilyl ester | C10H24O3Si2 | 9.80 | 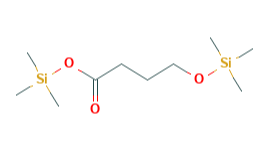 |
| 5 | 13.00 | Cyclohexene, 3,5,5-trimethyl-3-phenyl-1-(trimethylsilyloxy)- | C18H28OSi | 6.92 | 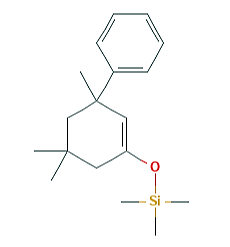 |
| 6 | 13.30 | 1H-Purine-2,6-dione,3,7-dihydro-3-methyl-8-(4-phenylamino-2-thia-4-oxobutyl)- | C15H15N5O3S | 14.26 | 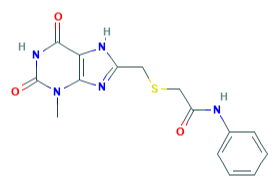 |
| 7 | 14.63 | Benzothiazole, 2-[(2-methoxyphenyl)dithio]- | C14H11NOS3 | 11.92 | 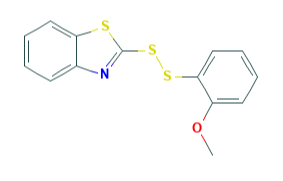 |
| 8 | 18.18 | 3-Methoxy-4-methyl-6-phenyl-5-oxo-4,5-dihydro-triazine | C11H11N3O2 | 6.57 | 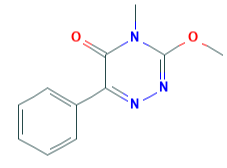 |
| **Total** | | | | **99.98%** | |

Table 2: Phytochemical compounds of Withania frutescens (L.) Pauquy collected from Station A3

| **Peak** | **RT** | **Compound** | **Molecular**  **Formula** | **Area**  **(%)** | **Structure** |
| --- | --- | --- | --- | --- | --- |
| **1** | 7.06 | Benzeneethanal, 4-[1,1-dimethylethyl]-.alpha.-methyl- | C13H18O | 5.96 | 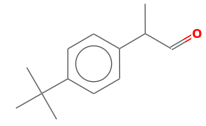 |
| **2** | 8.24 | Morpholine-4-carbaldehyde-[(4',4',6',6'-tetramethyl-1-thiaspiro[2.3]hex-5'-ylidene)hydrazone] | C14H23N3OS | 12.43 | 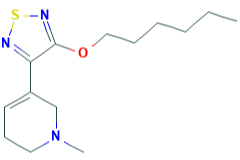 |
| **3** | 9.04 | 2H-1,4-Benzodiazepin-2-one, 1,3-dihydro-7-nitro-5-phenyl | C15H11N3O3 | 9.95 | 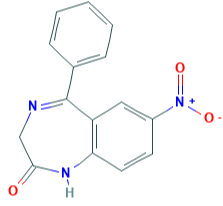 |
| **4** | 9.18 | 1-methyl-2-(p-nitrophenyl)-benzimidazole | C14H11N3O2 | 40.73 | 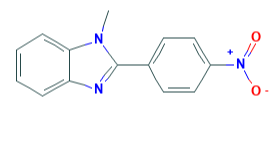 |
| **5** | 12.30 | 2-Heptanethiol, 2-methyl- $$ 2-Methyl-2-heptanethiol | C8H18S | 17.52 | 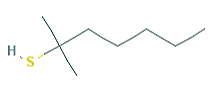 |
| **6** | 12.40 | 17-Pentatriacontene | C35H70 | 13.39 | 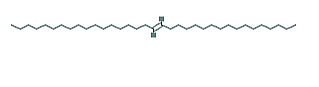 |
| **Total** | | | | **99.98** | |
